# Supplementary material
Source: Elsevier journal article supplement (https://researchonline.lshtm.ac.uk/id/eprint/78/1/mmc4.pdf)
Supplement: mmc4 [file mmc4.pdf]

**Table 7:** *In vivo* confocal microscopy parameters by Clinical Inflammation Grade (Trachomatous Scarring Study subjects only).

| Parameter                                                                     | Clinical Inflammation Grade |             |      |             |      |             |      |             | Test for trend* |
|-------------------------------------------------------------------------------|-----------------------------|-------------|------|-------------|------|-------------|------|-------------|-----------------|
|                                                                               | P0                          |             | P1   |             | P2   |             | P3   |             |                 |
| IVCM inflammatory infiltrate score (cells/mm <sup>2</sup> )<br>[mean (95%CI)] | 693                         | (657-730)   | 850  | (799-902)   | 983  | (902-1063)  | 974  | (724-1224)  | 0.06            |
| IVCM connective tissue organization score<br>[mean (95%CI)]                   | 0.91                        | (0.85-0.97) | 1.42 | (1.33-1.52) | 1.51 | (1.36-1.66) | 1.48 | (0.97-1.98) | 0.23            |
| Dendritiform cells present<br>[n (%)]                                         | 18                          | (4.8)       | 20   | (10.9)      | 14   | (17.8)      | 5    | (62.5)      | 0.03            |
| Tissue edema present<br>[n (%)]                                               | 9                           | (2.4)       | 4    | (2.2)       | 13   | (16.7)      | 5    | (62.5)      | <0.001          |

\* Adjusted for age, sex and Clinical Scarring Grade

CI = Confidence interval
